# Supplementary material
Source: Springer Nature journal article supplement (https://www.springermedizin.de/resource/supplementary/13099_2012_62_MOESM3_ESM.pdf/9665508)

**A** 81-176 wt 81-176 $\Delta$ htrA

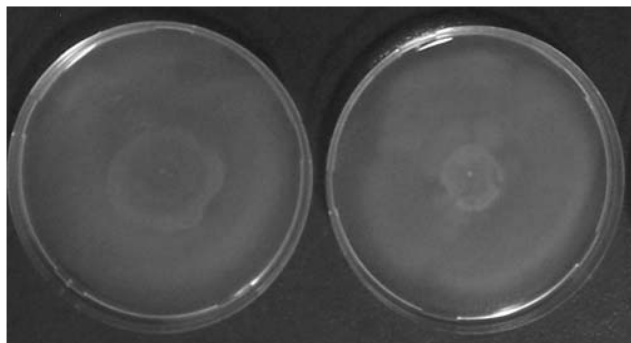

**B**

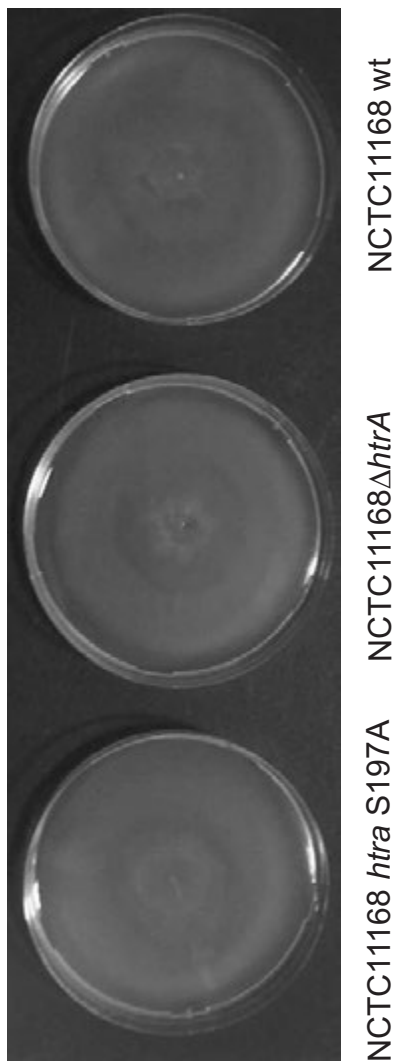

**C**

NCTC11168 wt  
NCTC11168 $\Delta$ htrA  
NCTC11168 htra S197A  
81-176 wt  
81-176 $\Delta$ htrA  
81-176 $\Delta$ flaA/B

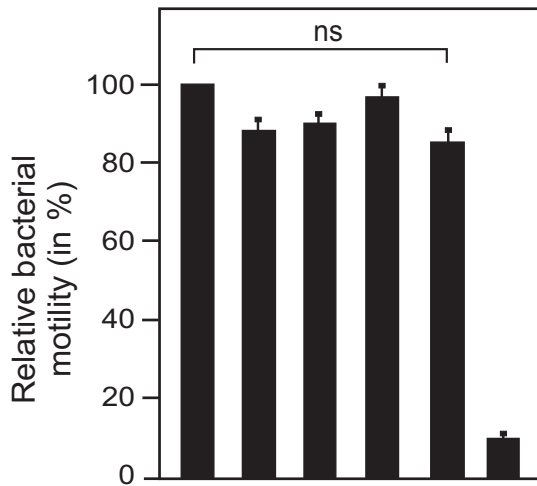

Supplement: MOESM3 [file 9665508]
